# Supplementary material for: Refining crystal structures with experimental 13C NMR shift tensors and lattice-including electronic structure methods
Source: Royal Society of Chemistry journal article supplement (doi:10.1039/c3ce40108a), 2013-01-01

## Electronic Supplementary Information.

### Contents.

|                                            |   |
|--------------------------------------------|---|
| $^1\text{H}$ shift assignments             | 1 |
| $^1\text{H}/^{13}\text{C}$ HETCOR spectrum | 2 |

The following  $^1\text{H}$  shifts were determined from the  $^1\text{H}/^{13}\text{C}$  HETCOR analysis.  
Corresponding  $^{13}\text{C}$  shifts are included in the manuscript in Table 1.

| Position | $\delta\ ^1\text{H}$ (ppm) |
|----------|----------------------------|
| C1N – H  | 7.9                        |
| C2 – H   | 6.6                        |
| C3 – H   | 5.4                        |
| C4O – H  | 8.6                        |
| C5 – H   | 4.4                        |
| C6 – H   | 5.4                        |
| C8 – H   | -0.4                       |

An expansion of the  $^1\text{H}/^{13}\text{C}$  HETCOR spectrum emphasizing the aromatic, NH (7.9 ppm) and OH (8.6 ppm) protons of acetaminophen. Correlation involving methyl protons have been omitted. Acquisition parameters are included in the manuscript.

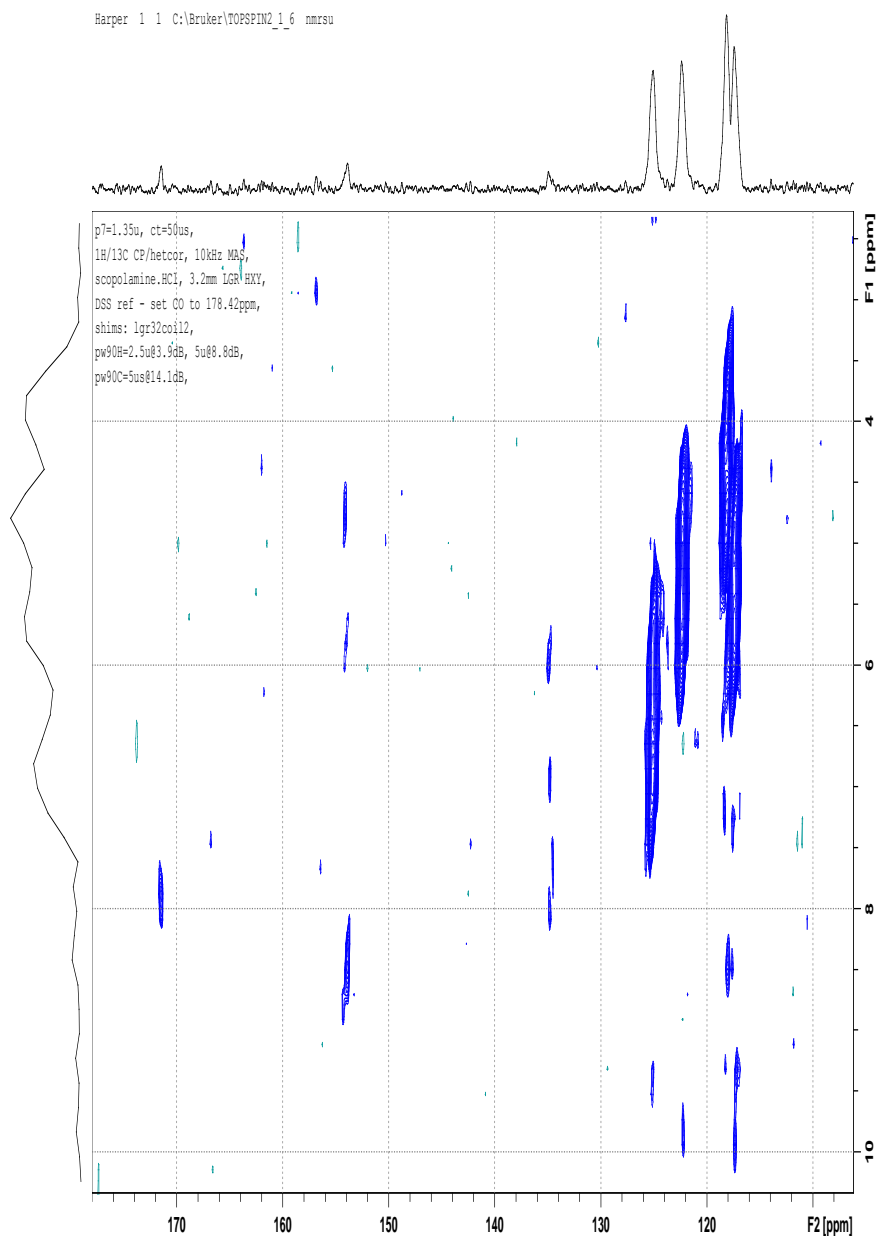

Supplement: c3ce40108a.pdf [file c3ce40108a.pdf]
